# Supplementary material for: The development of Nanosota-1 as anti-SARS-CoV-2 nanobody drug candidates
Source: eLife. 2021 Aug 2;10:e64815. doi: 10.7554/eLife.64815 (PMC8354634; doi:10.7554/eLife.64815)
Supplement: Source data 1. [file elife-64815-data1.xlsx]

## Sheet: 工作表1
Figure 3A
μg/ml	Nanosota-1C				MEAN	SE	Nanosota-1C-Fc				MEAN	SE	ACE2				MEAN	SE
40	92.7324	96.2082	98.0093	98.0093	96.2398	2.15435	97.4045	98.3778	98.2805	98.9294	98.248	0.546272	50.6341	61.8691	49.1701	64.1501	56.4559	6.62344
20	87.0448	87.6768	94.2176	92.6376	90.3942	3.0925	99.0267	98.0534	98.9294	99.2538	98.8158	0.45566	37.6968	32.9305	36.5733	30.7856	34.4966	2.77392
10	79.1453	71.5617	73.9948	68.6231	73.3312	3.85814	97.4045	97.4045	96.9827	97.6316	97.3558	0.234518	12.8436	18.6314	22.5806	9.67742	15.9333	5.00372
5	66.1901	64.9261	64.1994	54.72	62.5089	4.553	94.1601	92.8624	94.3872	97.3072	94.6792	1.62495	8.75819	5.35365	4.23015	11.3797	7.43042	2.82464
2.5	54.4988	58.9225	61.9875	55.9839	57.8482	2.87152	87.9958	88.6447	84.3296	89.8451	87.7038	2.05795	0.24683	0.24683	1.84697	7.29424	2.40872	2.89531
1.25	39.3317	38.6997	32.6013	31.3374	35.4925	3.55843	83.7781	78.1653	77.9382	76.316	79.0494	2.82172	-8.94544	-2.47681	1.16606	-7.00485	-4.31526	3.94009
0.625	23.2167	17.213	15.8543	10.1667	16.6127	4.63949	66.9073	65.934	66.4855	68.5295	66.9641	0.967451	2.97047	-1.7959	-3.94076	3.54924	0.195761	3.16316
0.3125	10.8934	9.31353	15.2224	7.00687	10.6091	3.00074	52.5347	55.2275	58.699	64.2145	57.6689	4.36538	-3.15772	-0.093625	-6.6644	0.825602	-2.27253	2.93335
0.15625	8.99755	-4.27364	8.2708	5.42697	4.60542	5.29713	45.8188	49.9392	42.8015	53.508	48.0169	4.05829	-1.7959	-2.81726	5.59197	-1.55758	-0.144693	3.34569
0.078125	0.782052	0.466072	8.2708	5.42697	3.73647	3.27269	27.0014	36.0857	29.824	30.1484	30.7649	3.3068	-8.94544	2.97047	-4.62167	-8.02621	-4.65572	4.68833
0.0390625	-3.95766	2.67794	3.18351	-0.260684	0.410775	2.84439	18.2415	23.1081	14.8998	15.8731	18.0307	3.17341	-2.13635	-5.5409	5.25151	2.18742	-0.0595795	4.1114
0.0195312	-5.53756	0.782052	6.05893	8.90276	2.55154	5.50464	14.6727	3.96626	6.14	12.3043	9.27082	4.36816	0.927739	2.63001	4.91106	4.74083	3.30241	1.63921
0.00976562	5.74295	5.11099	-3.10451	6.05893	3.45209	3.80081	1.04631	2.01963	-3.30116	5.81556	1.39508	3.24449	1.50651	-2.23849	2.18742	2.63001	1.02136	1.92415
0.00488281	4.79501	0.0552966	1.31922	5.42697	2.89912	2.26759	6.78887	2.89561	7.76219	1.9223	4.84224	2.48148	1.40437	-0.672398	0.24683	0.485148	0.365989	0.739069
Figure 3B
Nanosota-1C ( μg/ml )	100	20	4	0.8	0.16		VIRUS ALONE (0 μg/ml )
1	10	28	43	57	61		1	82
2	3	26	40	53	65		2	103
3	12	27	45	67	75		3	89
Average	8.33333	27	42.6667	59	67		Average	91.3333
							half Ave.	45.6667
Nanosota-1C-FC ( μg/ml )	100	20	4	0.8	0.16
1	3	7	18	26	41
2	1	5	12	35	49
3	5	5	16	33	46
Average	3	5.66667	15.3333	31.3333	45.3333
Figure 3-figure-supplement 1
μg/ml	Nanosota-1C				MEAN	SE	Nanosota-1C-Fc				MEAN	SE	ACE2				MEAN	SE
40	98.5059	98.8379	98.7881	98.9541	98.7715	0.164767	99.6725	99.8362	99.4595	98.8045	99.4432	0.392202	64.034	56.533	51.0733	47.9951	54.9089	6.09133
20	94.5215	96.0156	96.4638	97.4599	96.1152	1.05828	98.526	99.5087	99.132	97.4943	98.6652	0.761546	51.5593	45.7108	38.55	40.964	44.196	4.97083
10	74.4335	78.0858	71.8934	70.8807	73.8234	2.7805	97.0521	94.4317	97.3305	90.6158	94.8575	2.69747	34.8562	25.9457	25.7351	33.1875	29.9311	4.13372
5	67.7928	61.3182	57.118	57.4334	60.9156	4.30134	95.4143	92.794	94.8739	87.3403	92.6056	3.19346	15.4151	19.4816	7.91414	14.5565	14.3418	4.15121
2.5	46.8747	44.0525	48.6511	51.3074	47.7214	2.6411	93.1215	91.8113	93.0724	84.5562	90.6404	3.55174	7.3147	7.3147	10.9923	6.76387	8.0964	1.68701
1.25	25.2926	23.1178	30.2233	18.0709	24.1761	4.36488	81.8212	81.8212	78.3328	73.2558	78.8077	3.50752	4.88457	6.66667	6.13204	4.02592	5.4273	1.03575
0.625	6.0347	11.5132	11.6128	11.1148	10.0689	2.33659	70.0295	76.2529	72.1094	75.2211	73.4032	2.47393	2.42203	0.996355	7.39571	3.84771	3.66545	2.37793
0.3125	1.88429	1.20362	4.15871	9.1226	4.09231	3.10355	53.9797	61.8408	58.6636	54.4219	57.2265	3.23129	0.202511	5.3868	-1.64439	3.88011	1.95626	2.80669
0.15625	4.0259	1.18702	4.97219	1.96729	3.0381	1.52394	42.9741	44.4481	46.3642	46.0367	44.9558	1.35433	3.91252	-0.121507	5.64601	-0.672337	2.19117	2.66679
0.078125	3.19582	-5.0884	1.9839	1.0044	0.273927	3.19177	18.5555	27.9234	25.1883	15.755	21.8556	4.89981	-0.283516	-1.61199	5.98623	0.299716	1.09761	2.90623
0.0390625	-5.27102	0.141114	4.64016	0.60596	0.0290529	3.52486	23.3541	12.7088	5.12611	8.72912	12.4795	6.82728	-4.51195	0.623734	4.99797	3.88011	1.24747	3.69314
0.0195312	8.69096	2.86378	-7.64506	3.31203	1.80543	5.91845	-4.81494	12.6924	1.99803	-1.44121	2.10858	6.56822	2.55164	3.00527	-1.01256	2.61644	1.7902	1.62744
0.00976562	-1.68507	-0.356935	2.16651	0.755375	0.219972	1.41754	3.43924	-1.04815	2.0963	-4.71667	-0.0573207	3.14465	2.42203	0.785743	3.00527	2.17902	2.09802	0.814971
0.00488281	2.39894	0.190919	1.55225	0.373537	1.12891	0.900362	1.96528	-1.70324	1.52309	2.16181	0.986734	1.57019	-5.64601	2.27623	3.02147	-0.607533	-0.238963	3.40325
Figure 3-figure-supplement 2
μg/ml	Nanosota-1C			MEAN	SEM	Nanosota-1C-Fc			MEAN	SEM	ACE			MEAN	SEM
0.0001	0	0	0	0	0	0	0	0	0	0	0	0	0	0	0
0.16	33.2117	28.8321	17.8832	26.6423	4.5584	55.1095	46.3504	49.635	50.365	2.55474
0.8	37.5912	41.9708	26.6423	35.4014	4.5584	71.5328	61.6788	63.8686	65.6934	2.98735
4	52.9197	56.2044	50.7299	53.2847	1.59085	80.292	86.8613	82.4818	83.2117	1.93119
20	69.3431	71.5328	70.438	70.438	0.632112	92.3358	94.5255	94.5255	93.7956	0.7299
100	89.0511	96.7153	86.8613	90.8759	2.98735	96.7153	98.9051	94.5255	96.7153	1.26428
250											9.62343	-0.418406	8.3682	5.85774	3.15893
500											35.9833	38.4937	27.1967	33.8912	3.42483
1000											47.2803	48.5356	44.7699	46.8619	1.10701
2000											74.8954	81.1715	68.6192	74.8954	3.62354
Figure 4A
study day	Control						24 Pre-Challenge 20mg/kg						4h Post-Challenge 20mg/kg						4h Post-Challenge 10mg/kg
0	0	0	0	0	0	0	0	0	0	0	0	0	0	0	0	0	0	0	0	0	0	0	0	0
1	-2.07547	-3.12185	-1.2024	-2.65957	-4.16222	-8.38117	-2	-0.795229	-0.994036	-0.756757	0.655022	-1.40086	-6.00394	-4.20082	-5.57157	-0.776053	-4.53141	-3.79347	-5.64752	-3.16327	-10.2222	-4.77356	-3.4413	-2.17628
2	-4.15094	-6.24371	-5.01002	-6.06383	-8.43116	-12.3995	-2.22222	-1.49105	-0.894632	-2.59459	-2.40175	-3.23276	-4.82283	-2.76639	-5.57157	-4.102	-7.51802	-4.32034	-5.3554	-2.95918	-3.33333	-6.11995	-7.18623	-3.37323
3	-3.86792	-10.3726	-5.81162	-7.23404	-8.43116	-14.0069	0.111111	2.98211	1.19284	-3.02703	-1.63755	-2.90948	-3.34646	-0.819672	-4.32277	-5.54324	-9.16581	-4.74183	-3.11587	-0.612245	-1.77778	-6.24235	-9.81781	-4.24374
4	-3.01887	-13.8973	-6.81363	-7.87234	-8.43116	-14.3513	3.22222	6.16302	4.57256	-2.7027	0.218341	-0.538793	0.492126	0.819672	-0.480307	-6.98448	-9.68074	-4.00422	-0.292113	1.42857	1.66667	-1.95838	-10.0202	-1.95865
5	-3.67925	-16.5156	-4.40882	-10.1064	-8.96478	-15.0402	-7.11111	7.25646	6.85885	-1.40541	0.982533	-0.107759	2.75591	1.02459	0.67243	-8.31486	-8.34192	-2.63435	0.778968	3.26531	3.55556	0.367197	-8.60324	0.108814
6	-6.41509	-11.3797	-6.21242	-11.2766	-9.4984	-15.8439	4.22222	4.97018	0.397614	-0.432432	-0.655022	-0.862069	-0.295276	2.97131	-1.53698	-8.53659	-5.76725	-0.52687	-1.46056	0.714286	2.55556	2.57038	-11.1336	-1.19695
7	0.471698	-5.94159	-5.81162	-6.06383	-5.12273	-12.3995	8.66667	9.74155	0.596421	1.40541	1.74672	2.37069	2.65748	5.02049	1.82517	-4.87805	-0.30896	2.52898	3.31061	4.08163	7	7.71114	-8.40081	1.84984
8	4.43396	-3.52467	2.00401	-5.74468	-4.16222	-9.52928	8.66667	11.829	4.97018	1.62162	1.96507	1.93966	6.49606	5.32787	5.57157	-3.32594	-1.5448	3.2666	5.74489	8.06122	8.44444	8.81273	-6.88259	2.82916
9	5	-1.81269	5.61122	-4.25532	-2.02775	-8.03674	8.88889	13.3201	7.55467	3.45946	4.14847	2.58621	6.49606	4.71311	5.37944	0.332594	0.61792	5.05796	6.13437	9.4898	9.11111	12.6071	-3.74494	3.04679
10	5.09434	1.51057	8.41683	-2.55319	-0.747065	-6.77382	7.88889	13.0219	7.95229	4.21622	5.78603	3.98707	7.08661	7.27459	4.32277	1.44124	2.05973	6.00632	5.55015	9.89796	9.22222	13.0967	-2.02429	4.57018
	Control		24 Pre-Challenge 20mg/kg		4h Post-Challenge 20mg/kg		4h Post-Challenge 10mg/kg
study day	MEAN	SEM	MEAN	SEM	MEAN	SEM	MEAN	SEM
0	0	0	0	0	0	0	0	0
1	-3.60045	1.03861	-0.881977	0.361356	-4.14621	0.755348	-4.90402	1.17563
2	-7.04987	1.22085	-2.1395	0.339024	-4.85019	0.653738	-4.72122	0.713746
3	-8.28738	1.4589	-0.548	0.980407	-4.65663	1.12066	-4.30163	1.36119
4	-9.0641	1.77712	1.82244	1.37827	-3.30632	1.77095	-1.85569	1.75423
5	-9.78584	2.1593	1.07893	2.20783	-2.47303	1.98382	-0.0878997	1.80764
6	-10.1043	1.47272	1.27342	1.06954	-2.28194	1.69751	-1.32515	2.08674
7	-5.81127	1.66769	4.08791	1.64058	1.14085	1.39136	2.59207	2.37882
8	-2.75381	2.09548	5.16537	1.73115	2.63189	1.67516	4.50164	2.45456
9	-0.920212	2.17179	6.65963	1.66605	3.76618	1.0696	6.10737	2.37449
10	0.824611	2.2208	7.14206	1.36796	4.69854	1.02898	6.71882	2.1562
Figure 4B
		Control	24 h pre-challenge 20 mg/kg	4 h post-challenge 20 mg/kg	4 h post-challenge 10 mg/kg
Hyperplasia, Bronchiolo-alveolar	Animal1	3	0	0	2	Male
	Animal2	3	0	3	2	Male
	Animal3	3	0	3	3	Male
	Animal4	3	0	0	0	Female
	Animal5	3	0	2	2	Female
	Animal6	3	0	0	0	Female
	MEAN	3	0	1.33333	1.5
	SEM	0	0	0.614636	0.5
Figure 4C
Log virus titer	PBS	24h Pre-20mg/kg	24h Pre-10mg/kg	4h Post-20mg/kg	4h Post-10mg/kg
	7.03476	3	3	6.40866	4.95223
	6.7354	3	4.01773	5.68425	4.01773
	7.06695	7.08961	3	5.30103	3.31876
	6.75651	4.76592	6.82526	5.32736	7.30553
	7.16386	4.16386	4.01773	3	6.63473
MEAN	6.95149	4.40388	4.17214	5.14426	5.24579
SEM	0.0866248	0.753113	0.701234	0.572113	0.757609
Figure 5B
Dilution ratio	-80 °C				MEAN	SEM	4 °C				MEAN	SEM	25 °C				MEAN	SEM	37 °C				MEAN	SEM
51	2.764	2.788	2.719	2.84	2.77775	0.0252004	2.786	2.72	2.682	2.626	2.7035	0.0335994	2.685	2.671	2.608	2.543	2.62675	0.0325535	2.599	2.533	2.515	2.48	2.53175	0.0249712
52	2.504	2.484	2.511	2.388	2.47175	0.0284967	2.53	2.525	2.438	2.436	2.48225	0.0261482	2.403	2.403	2.351	2.286	2.36075	0.027768	2.302	2.189	2.184	2.18	2.21375	0.0294742
53	1.849	1.775	1.812	1.802	1.8095	0.0153107	1.831	1.751	1.782	1.771	1.78375	0.0170067	1.719	1.713	1.772	1.644	1.712	0.0262583	1.585	1.524	1.483	1.552	1.536	0.0216217
Figure 5C
Dilution ratio	0.5 h			MEAN	SEM	2 h			MEAN	SEM	6 h			MEAN	SEM	1 day			MEAN	SEM	5 day			MEAN	SEM	10 day			MEAN	SEM
101	3.2095	3.2035	3.1845	3.19917	0.0075351	3.1945	3.2935	3.2625	3.25017	0.0292366	3.2985	3.3135	3.2735	3.29517	0.0116667	3.1935	3.1295	3.1395	3.15417	0.0198774	3.2575	2.9695	3.2165	3.14783	0.0899488	3.2015	3.2405	2.6745	3.03883	0.182514
102	2.8645	3.1905	2.9045	2.9865	0.102652	2.9585	3.1335	3.0385	3.0435	0.05058	3.1515	2.9885	3.1965	3.11217	0.0631832	2.9885	3.0055	2.9675	2.98717	0.0109899	2.9305	2.1495	2.7265	2.60217	0.233869	2.2505	2.2535	1.2885	1.93083	0.321168
103	0.9065	2.3325	1.1005	1.4465	0.446526	1.1235	1.5755	1.6095	1.43617	0.156641	1.5085	1.1895	1.4935	1.39717	0.103924	1.2085	1.3205	1.3835	1.30417	0.051174	0.9265	0.6015	0.8415	0.789833	0.0973111	0.4035	0.3545	0.2245	0.3275	0.0534072
104	0.0635	0.4265	0.1215	0.203833	0.112585	0.0575	0.1135	0.1645	0.111833	0.0308995	0.2155	0.1105	0.2175	0.181167	0.035338	0.1105	0.1675	0.1345	0.1375	0.0165227	0.0395	-0.0065	0.0265	0.0198333	0.013691	-0.0305	0.0035	-0.0345	-0.0205	0.0120554
Figure 5D
	6h			MEAN	SEM	24 h			MEAN	SEM	2 day			MEAN	SEM	3 day			MEAN	SEM
Blood	28.5243	38.7938	42.6103	36.6428	4.20609	58.7494	116.813	19.9581	65.1736	28.1436	45.4918	34.4141	31.1974	37.0345	4.32943	37.2147	46.215	21.8779	35.1025	7.10445
Heart	13.0751	8.92523	11.7668	11.2557	1.22492	12.7055	12.7546	6.64165	10.7006	2.02952	9.89681	12.2952	11.3918	11.1946	0.69933	12.5649	6.74778	13.5716	10.9614	2.12676
Lung	9.91145	11.3771	10.2862	10.5249	0.439596	14.5475	16.3872	6.6124	12.5157	2.99905	13.006	12.948	15.3067	13.7536	0.776736	15.5671	7.05452	18.8402	13.8206	3.51251
Liver	19.0174	15.6486	15.1504	16.6055	1.21452	19.1225	20.5314	8.40793	16.0206	3.828	15.6402	18.9698	20.2212	18.2771	1.36703	25.1876	9.25263	25.3	19.9134	5.3305
Spleen	4.62337	15.1339	9.37519	9.71083	3.03878	14.0365	10.205	6.44987	10.2304	2.19009	8.73583	14.5433	12.6804	11.9865	1.71199	12.781	7.09595	14.2129	11.3633	2.17334
Intestine	-0.48073	2.64295	4.18913	2.11712	1.37347	4.07115	4.03478	2.50533	3.53708	0.515984	3.50051	3.4442	4.38125	3.77532	0.303403	5.86831	2.72159	4.46227	4.35072	0.910091
Kidney	14.7587	12.6146	14.2319	13.8684	0.645054	33.6522	28.5848	29.54	30.5923	1.55459	26.8723	36.8289	29.3959	31.0324	2.98843	50.3056	36.9979	45.6547	44.3194	3.89918
Muscle	3.91218	3.88823	4.12922	3.97654	0.0766499	3.94073	4.51811	2.11279	3.52388	0.724963	3.73186	7.32876	4.61312	5.22458	1.08241	3.78861	2.95165	4.54435	3.76154	0.459973
Bone	1.87473	0.76278	3.06938	1.90229	0.666	9.34039	7.93	4.04574	7.10538	1.58307	5.74748	7.11345	8.01295	6.95796	0.65859	8.34343	4.4215	7.03713	6.60069	1.153
Figure 5-figure supplement 1A
Dilution ratio	0.5 h			2 h			6 h			24 h			5 day			10 day
101	1.067	0.987	0.693	0.641	0.409	0.443	-0.053	-0.036	-0.005	0.047	-0.073	-0.05	-0.055	-0.175	-0.079	-0.073	-0.122	-0.023
102	0.546	0.347	0.225	0.133	0.041	0.032	-0.01	-0.031	0.002	0.003	-0.058	-0.001	-0.011	-0.106	-0.037	-0.024	-0.06	0.044
103	0.146	0.038	0.029	0.067	0.043	-0.014	0.029	0.001	-0.012	0.01	-0.025	0.029	-0.041	-0.053	0.006	-0.015	-0.012	0.037
104	0.063	-0.008	0.02	0.033	0.018	0.034	0.082	0.074	0.076	-0.014	-0.014	0.016	-0.045	-0.045	0.022	0.052	0.018	0.086
Dilution ratio	0.5 h		2 h		6 h		24 h		5 day		10 day
	MEAN	SEM	MEAN	SEM	MEAN	SEM	MEAN	SEM	MEAN	SEM	MEAN	SEM
101	0.915667	0.113703	0.497667	0.0723356	-0.0313333	0.0140515	-0.0253333	0.0367711	-0.103	0.0366606	-0.0726667	0.0285793
102	0.372667	0.0935492	0.0686667	0.0322714	-0.013	0.00964365	-0.0186667	0.0197005	-0.0513333	0.0283451	-0.0133333	0.0304923
103	0.071	0.0375899	0.032	0.0240208	0.006	0.0120968	0.00466667	0.0158149	-0.0293333	0.0180031	0.00333333	0.0168556
104	0.025	0.0206478	0.0283333	0.00517472	0.0773333	0.0024037	-0.004	0.01	-0.0226667	0.0223333	0.052	0.0196299
Figure 5-figure supplement 1B
Dilution ratio	0.5 h			2 h			6 h			1 day			5 day			10 day
101	0.0358333	-0.0311667	-0.0321667	0.0378333	-0.0161667	-0.0511667	-0.0551667	-0.0481667	-0.0531667	-0.0381667	-0.0121667	-0.0391667	-0.0671667	-0.0401667	-0.0491667	-0.0361667	-0.0521667	-0.0781667
102	0.0418333	0.0148333	0.0038333	-0.0001667	-0.0191667	-0.0191667	-0.0081667	-0.0061667	-0.0271667	-0.0121667	0.0038333	-0.0071667	-0.0381667	-0.0281667	-0.0181667	-0.0281667	-0.0361667	-0.0181667
103	0.0218333	0.0018333	-0.0001667	-0.0111667	-0.0161667	-0.0191667	-0.0081667	0.0018333	-0.0051667	-0.0011667	-0.0041667	0.0008333	-0.0261667	-0.0151667	-0.0181667	-0.0131667	-0.0171667	-0.0071667
104	0.0338333	0.0018333	0.0118333	0.0258333	0.0028333	0.0208333	0.0148333	0.0128333	0.0078333	-0.0031667	-0.0001667	-0.0021667	-0.0111667	-0.0001667	0.0018333	-0.0091667	-0.0111667	-0.0101667
Dilution ratio	0.5 h		2 h		6 h		1 day		5 day		10 day
	MEAN	SEM	MEAN	SEM	MEAN	SEM	MEAN	SEM	MEAN	SEM	MEAN	SEM
101	-0.0091667	0.0225019	-0.00983337	0.0258865	-0.0521667	0.00208167	-0.0298334	0.00883805	-0.0521667	0.00793725	-0.0555	0.0122384
102	0.0201666	0.0112891	-0.0128334	0.00633333	-0.0138334	0.00669162	-0.0051667	0.00472582	-0.0281667	0.0057735	-0.0275	0.00520683
103	0.0078333	0.00702377	-0.0155	0.00233333	-0.00383337	0.00296273	-0.00150003	0.00145297	-0.0198334	0.00328295	-0.0125	0.00290593
104	0.0158333	0.00945163	0.0165	0.00698411	0.0118333	0.00208167	-0.00183337	0.000881917	-0.0031667	0.00404145	-0.0101667	0.00057735
Figure 5-figure supplement 1C
	1 h			MEAN	SEM	2h			MEAN	SEM	6h			MEAN	SEM	24 h			MEAN	SEM
Blood	1.04299	1.04809	0.930767	1.00728	0.0382864	0.470427	0.57653	0.468025	0.504994	0.0357747	0.543363	0.150201	0.115845	0.269803	0.137139	0.23403	0.125577	0.19262	0.184076	0.0315978
Heart	0.713743	0.483363	0.540237	0.579114	0.0692876	0.33117	0.248172	0.254222	0.277855	0.0267148	0.30347	0.309122	0.241265	0.284619	0.0217383	0.474443	0.243808	0.304535	0.340929	0.0690205
Lung	1.60887	1.23658	1.32334	1.3896	0.11246	0.51534	0.652494	0.546951	0.571595	0.0414661	0.419366	0.684368	0.708068	0.603934	0.0925374	0.969258	0.386498	0.801974	0.719243	0.173239
Liver	1.80371	1.72246	1.87354	1.7999	0.043653	1.4236	1.75763	1.23884	1.47336	0.151815	1.79442	1.89834	2.15746	1.95008	0.107945	3.1248	1.04278	2.88591	2.35116	0.657819
Spleen	0.878358	0.924894	0.785611	0.862954	0.0409385	0.904544	0.920117	0.511146	0.778602	0.133804	0.727691	0.611962	0.759856	0.699836	0.0449075	1.44288	0.511231	1.02	0.99137	0.269325
Intestine	0.959138	0.615964	0.679949	0.751684	0.105359	0.457351	0.341773	0.416364	0.405163	0.0338313	0.472171	0.274869	0.366252	0.371097	0.0570078	0.437332	0.167876	0.240664	0.281957	0.0804788
Kidney	-0.0193	161.925	5.58005	55.8287	53.073	16.5163	-0.02017	-0.01836	5.49259	5.51186	-0.0156247	3.79319	-0.03555	1.24734	1.27294	-0.04181	108.695	-0.0366	36.2054	36.2446
Muscle	1.18827	0.929132	0.896197	1.00453	0.0923585	0.548699	0.380561	0.498579	0.475946	0.049839	0.528544	0.469663	0.38282	0.460342	0.0423242	0.406207	0.208277	0.18553	0.266671	0.0700762
Bone	0.475751	0.389632	0.314532	0.393305	0.0465761	0.228381	0.195098	0.379742	0.26774	0.0568191	0.430169	1.52788	0.464181	0.807409	0.360368	0.601	0.302149	0.544598	0.482582	0.0916741
