# Supplementary material for: The development of Nanosota-1 as anti-SARS-CoV-2 nanobody drug candidates
Source: eLife journal article supplement (doi:10.7554/elife.64815), 2021-08-02
Supplement: supp [file Mouse lung histology.docx]

**Source files for “Histology: lungs (mice)” (related to Figure 4D)**

This zip archive contains all original images shown in Figure 4D. The filename of each source data indicates which panel of the figure it is related to in the figure 4D. The ruler in each source data image indicates the magnification.
